# Supplementary material for: Changes in lipid composition during sexual development of the malaria parasite Plasmodium falciparum
Source: PubMed Central journal article supplement (PMC4744411; doi:10.1186/s12936-016-1130-z), 2016-02-06

# Additional file 1

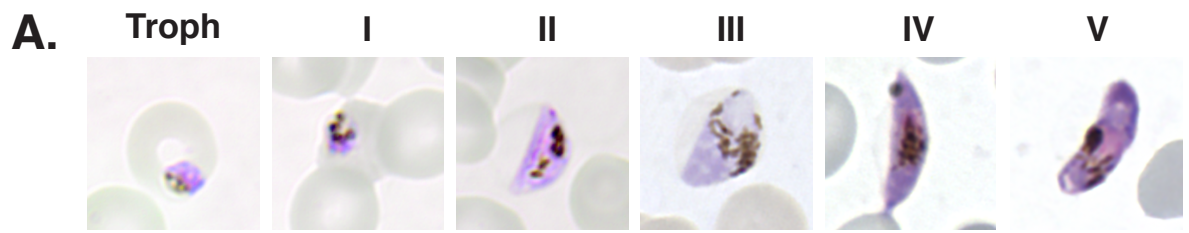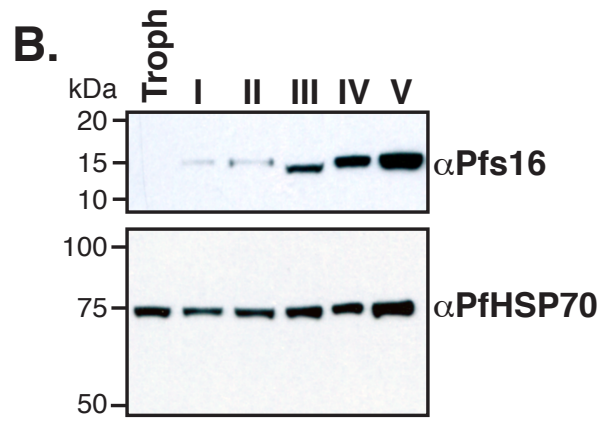

Supplement: 12936_2016_1130_MOESM1_ESM.pdf [file 12936_2016_1130_MOESM1_ESM.pdf]
