# Supplementary material for: Changes in lipid composition during sexual development of the malaria parasite Plasmodium falciparum
Source: PubMed Central journal article supplement (PMC4744411; doi:10.1186/s12936-016-1130-z), 2016-02-06
Supplement: 12936_2016_1130_MOESM2_ESM.pdf [file 12936_2016_1130_MOESM2_ESM.pdf]

## Additional file 2.

| Lipid Class and Ion                         | Internal Standard                 | nmol/sample |
|---------------------------------------------|-----------------------------------|-------------|
| PC [M+H] <sup>+</sup>                       | PC 19:0_19:0                      | 8           |
| PG [M-H] <sup>-</sup>                       | PG 17:0_17:0                      | 1           |
| PE [M+H] <sup>+</sup>                       | PE 17:0_17:0                      | 5           |
| SM [M+H] <sup>+</sup>                       | DHSM 12:0                         | 2           |
| Cer [M+H] <sup>+</sup>                      | Cer 17:0                          | 1           |
| PS [M+H] <sup>+</sup>                       | PS 17:0_17:0                      | 1           |
| CE [M+NH <sub>4</sub> ] <sup>+</sup>        | CE 22:1                           | 1           |
| Free Chol [M+NH <sub>4</sub> ] <sup>+</sup> | D <sub>7</sub> Free Chol          | 10          |
| DAG [M+NH <sub>4</sub> ] <sup>+</sup>       | DAG 17:0_17:0                     | 1           |
| TAG [M+NH <sub>4</sub> ] <sup>+</sup>       | D <sub>5</sub> TAG 16:0_16:0_16:0 | 1           |
