# Supplementary material for: Changes in lipid composition during sexual development of the malaria parasite Plasmodium falciparum
Source: PubMed Central journal article supplement (PMC4744411; doi:10.1186/s12936-016-1130-z), 2016-02-06

# Additional file 5A.

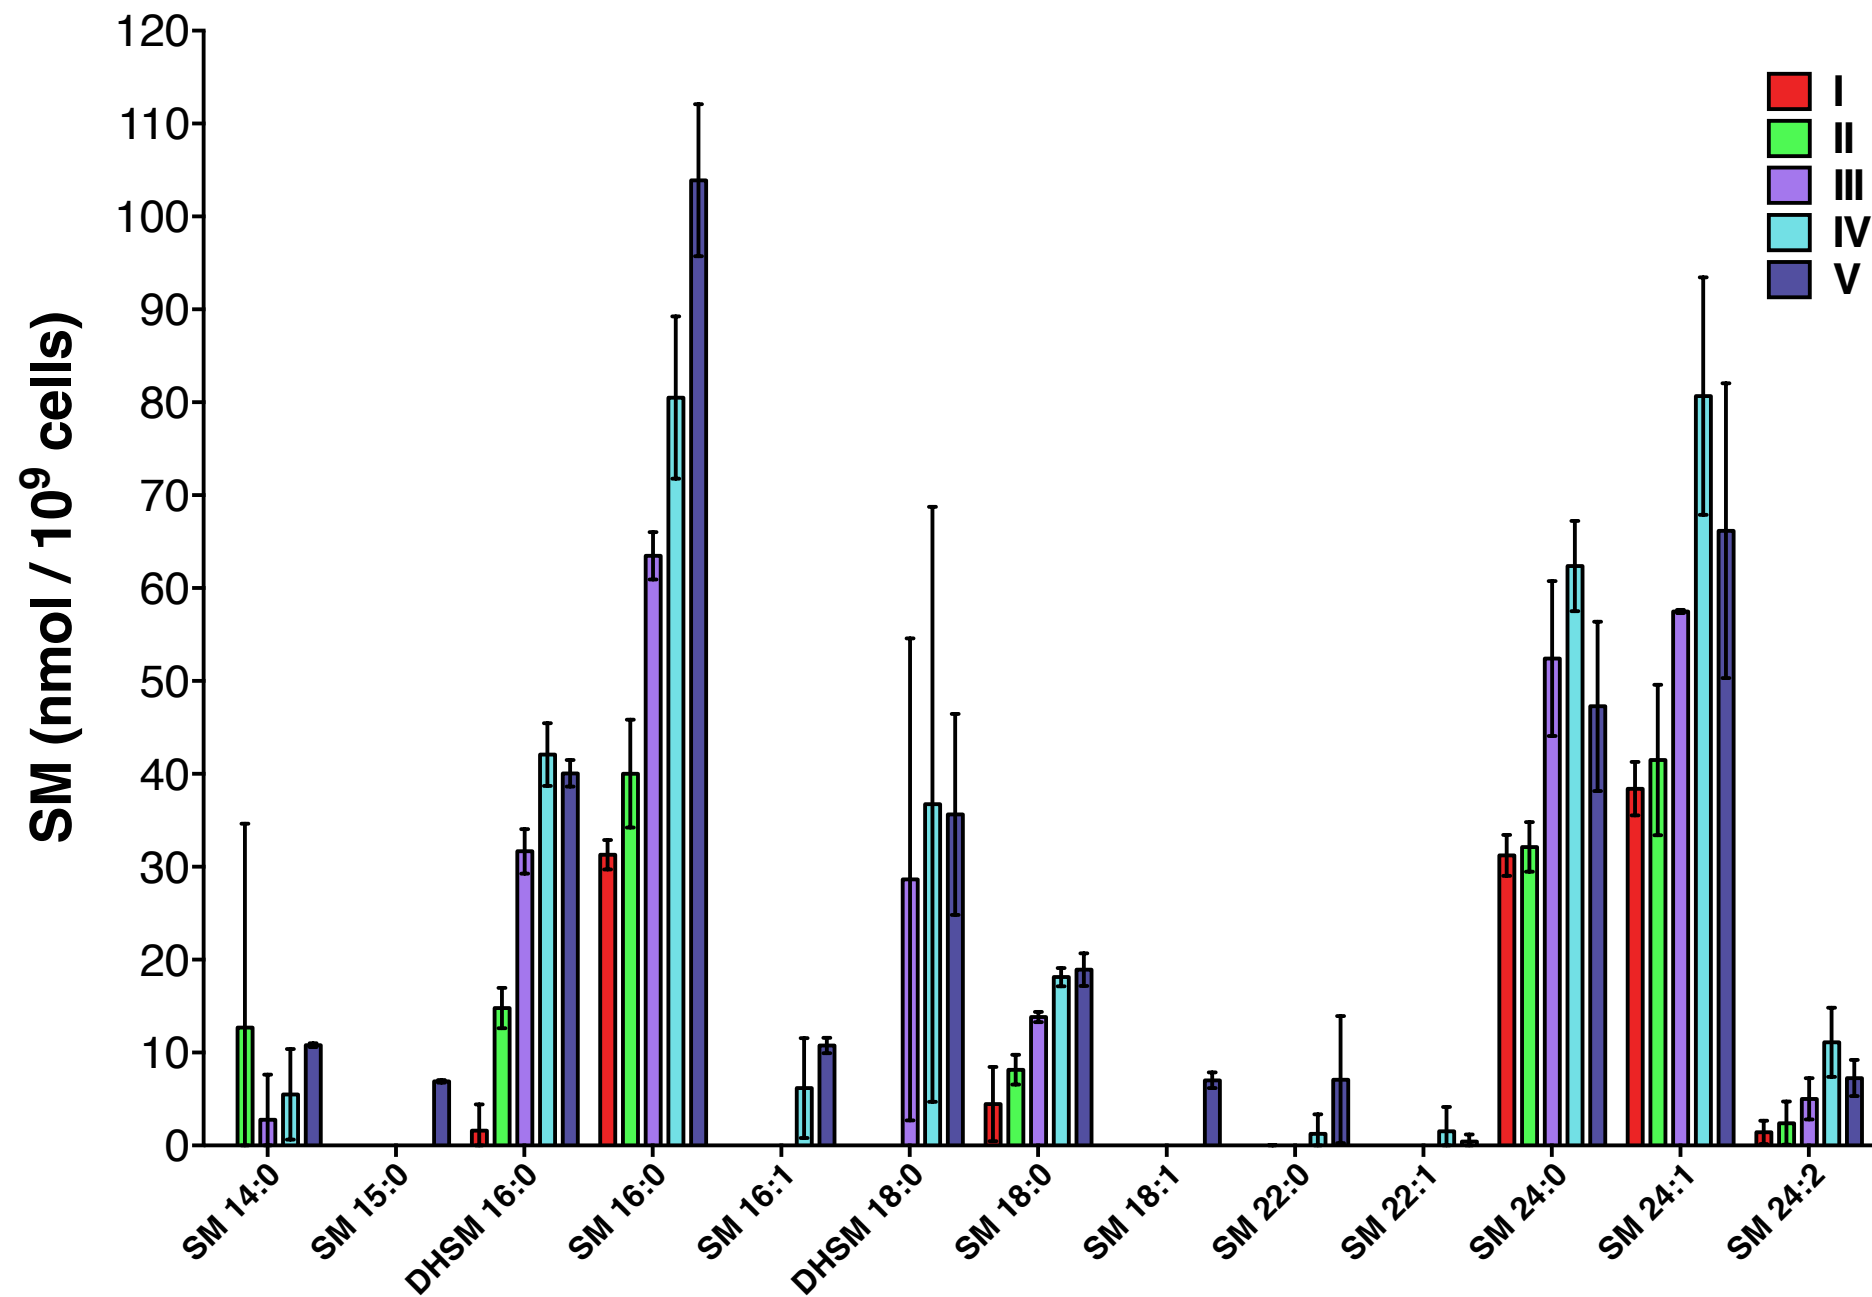

Additional file 5B.

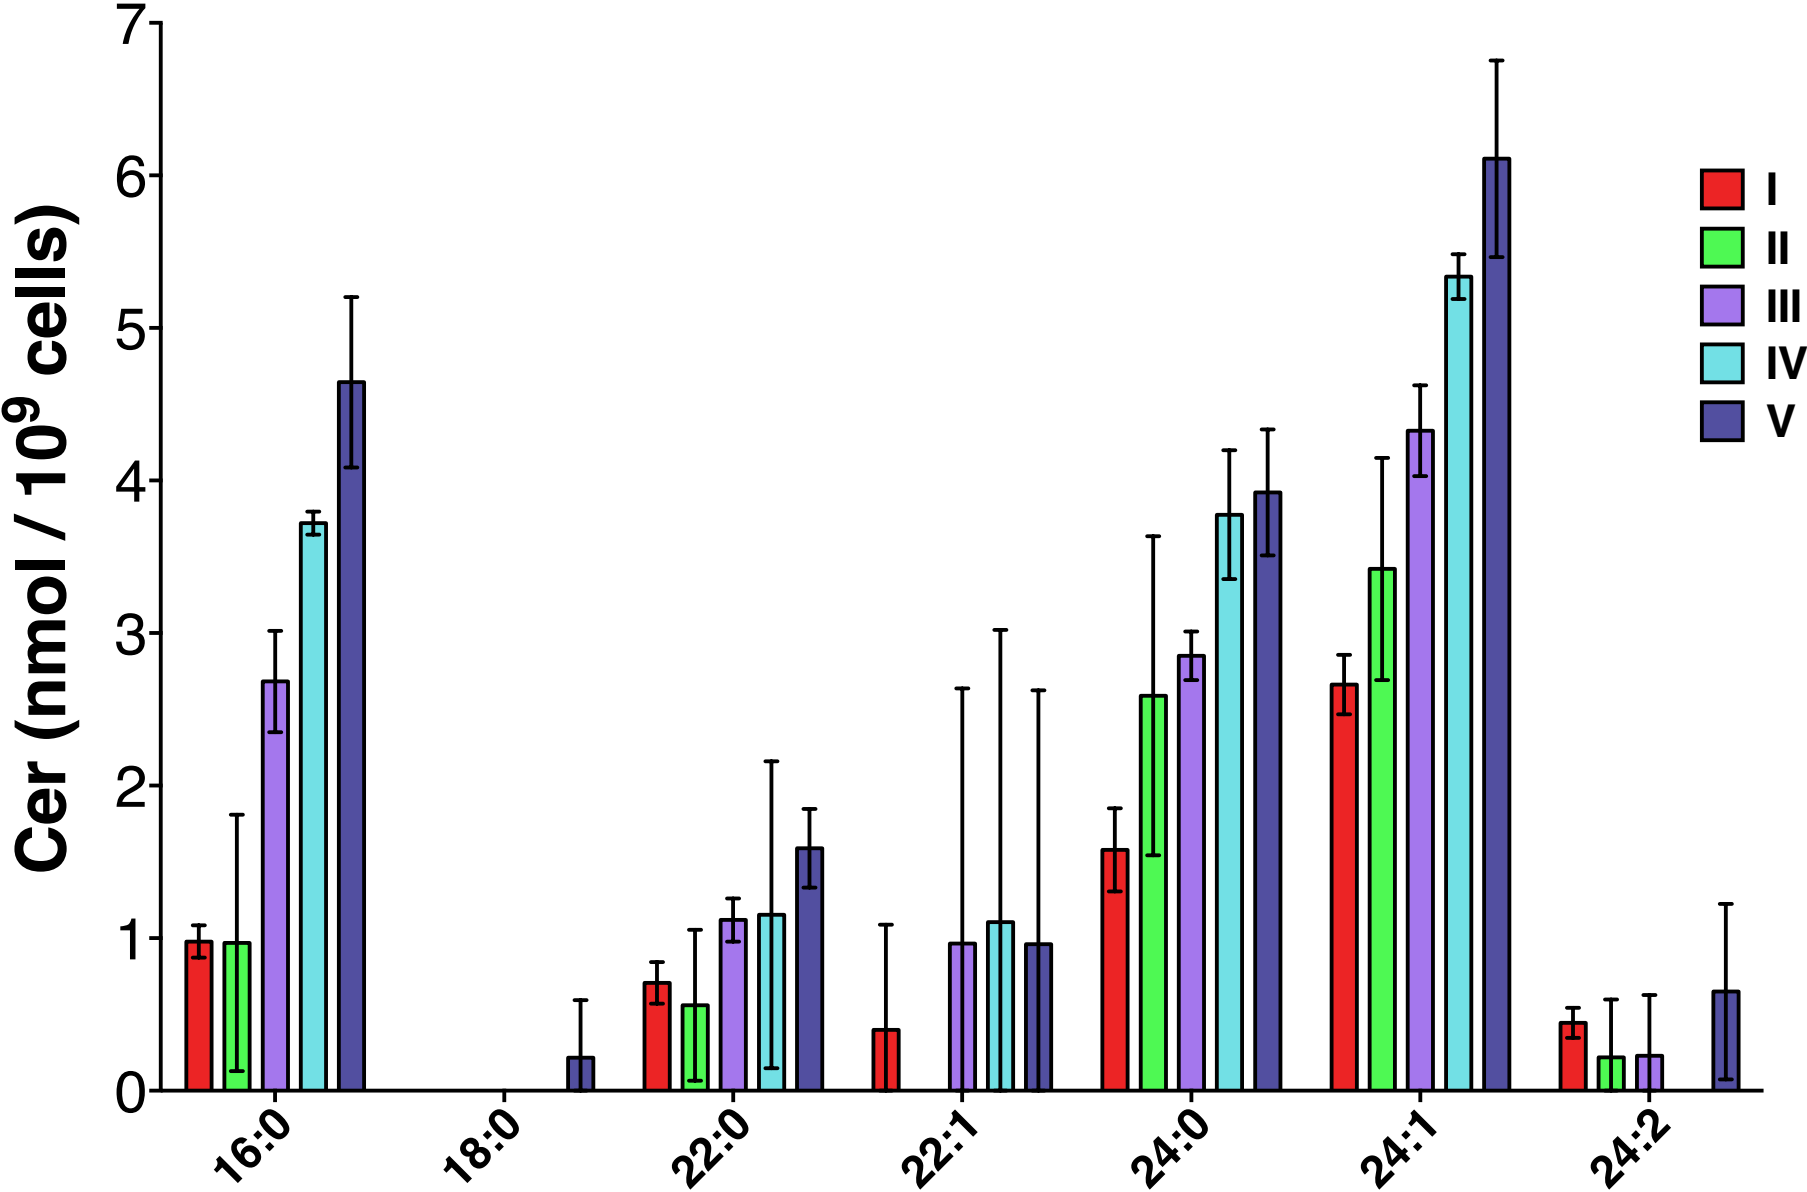

Additional file 5C.

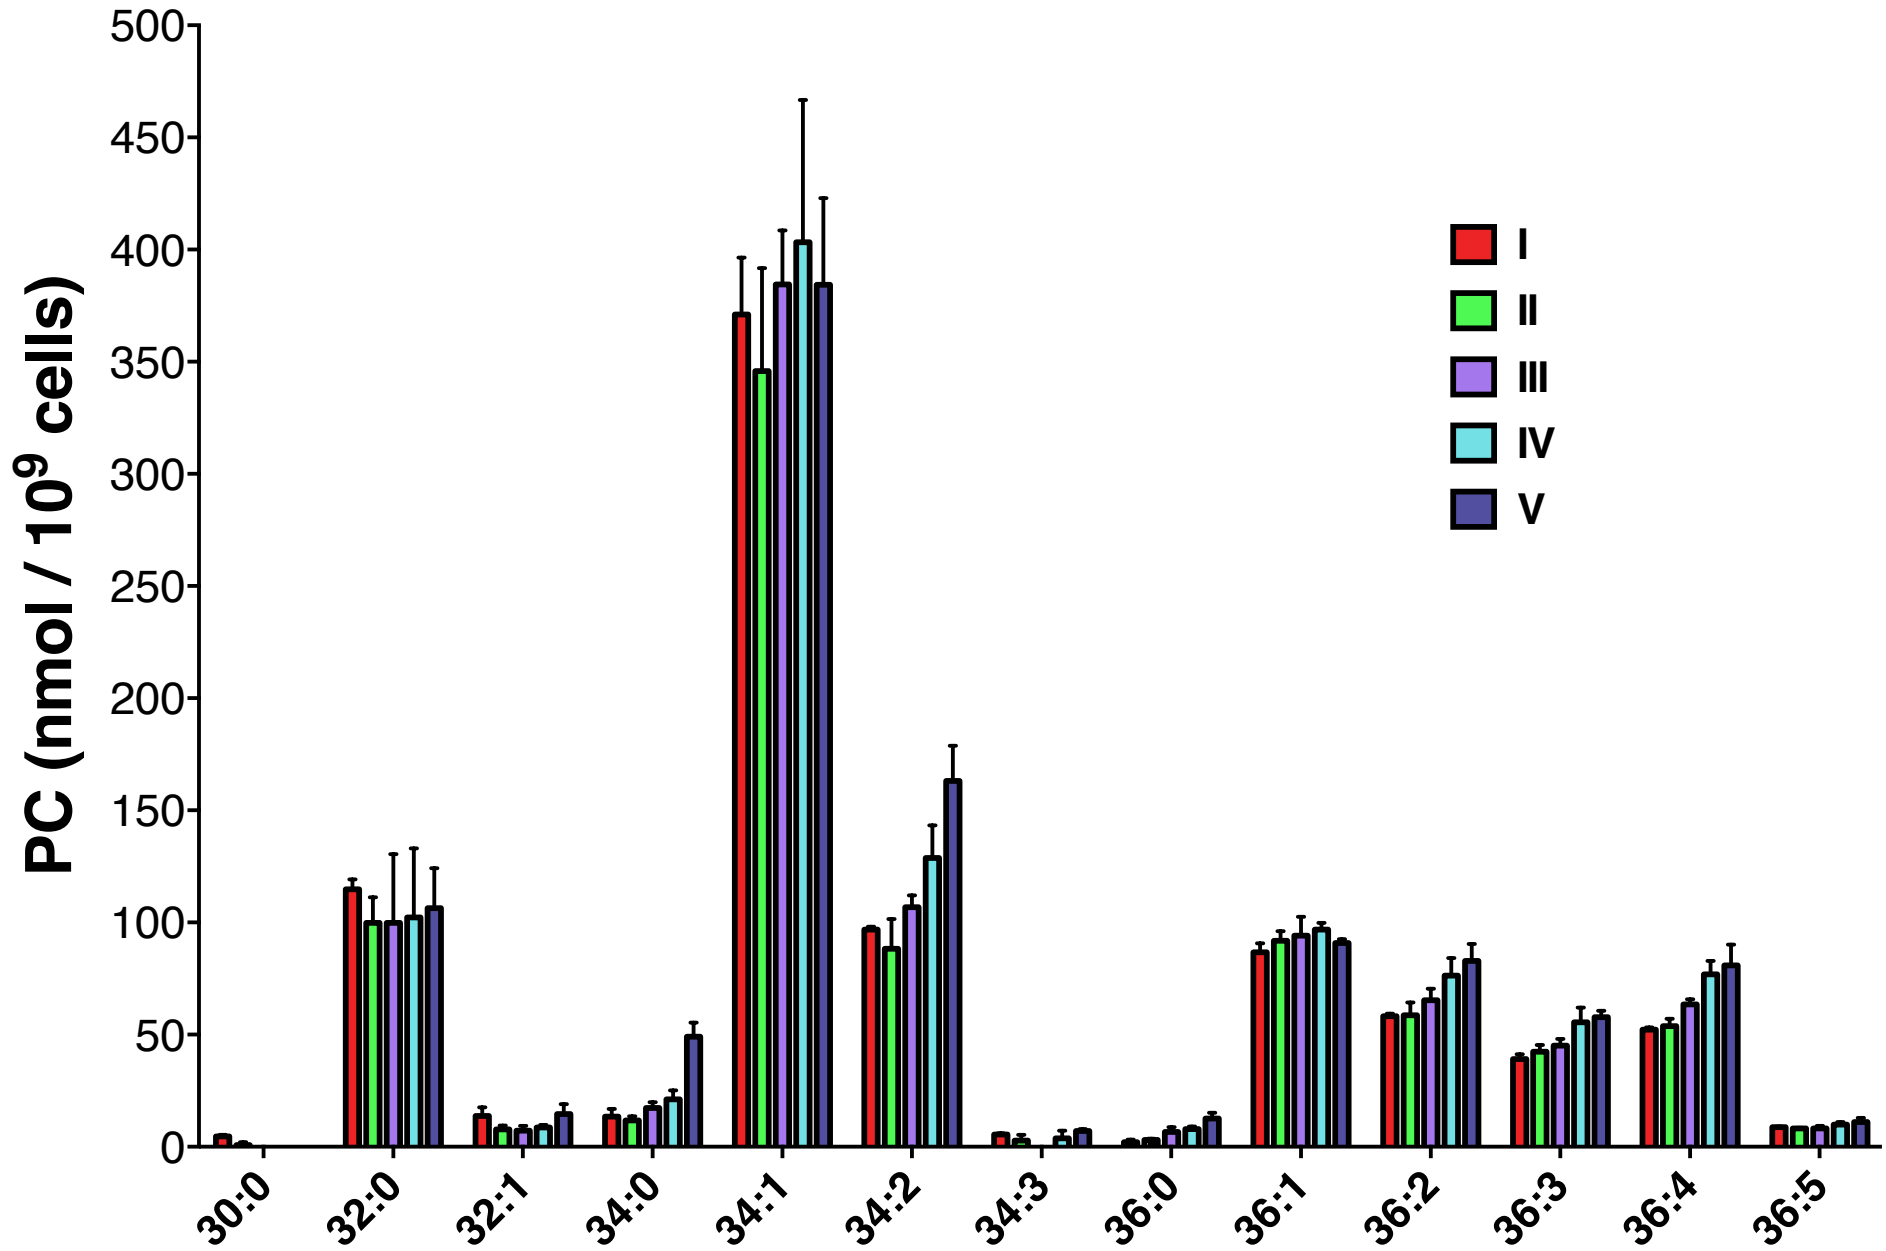

# Additional file 5C. (cont)

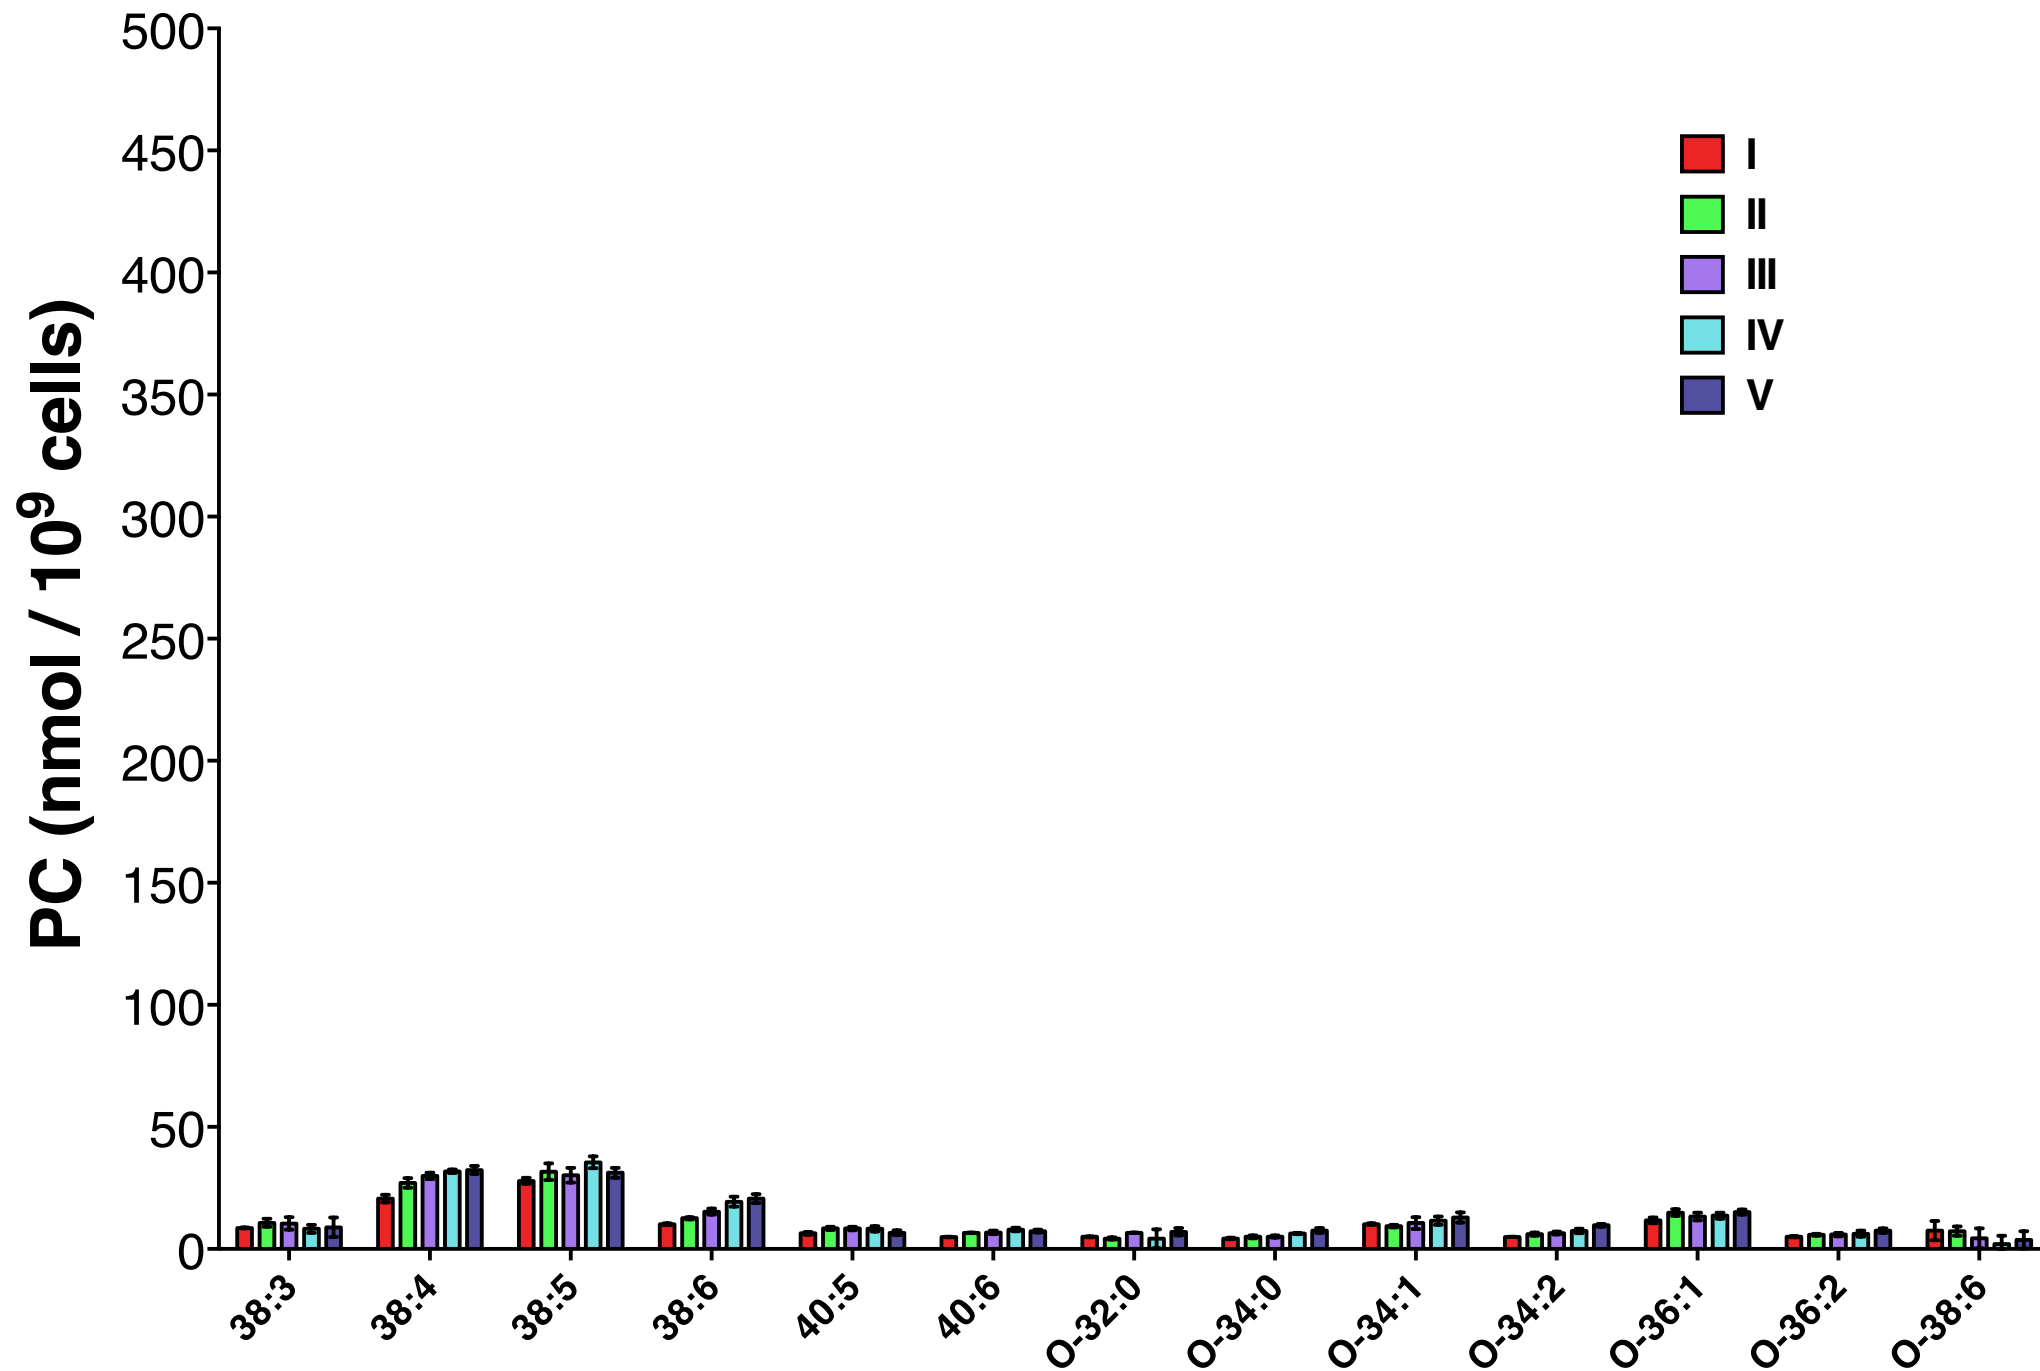

# Additional file 5D.

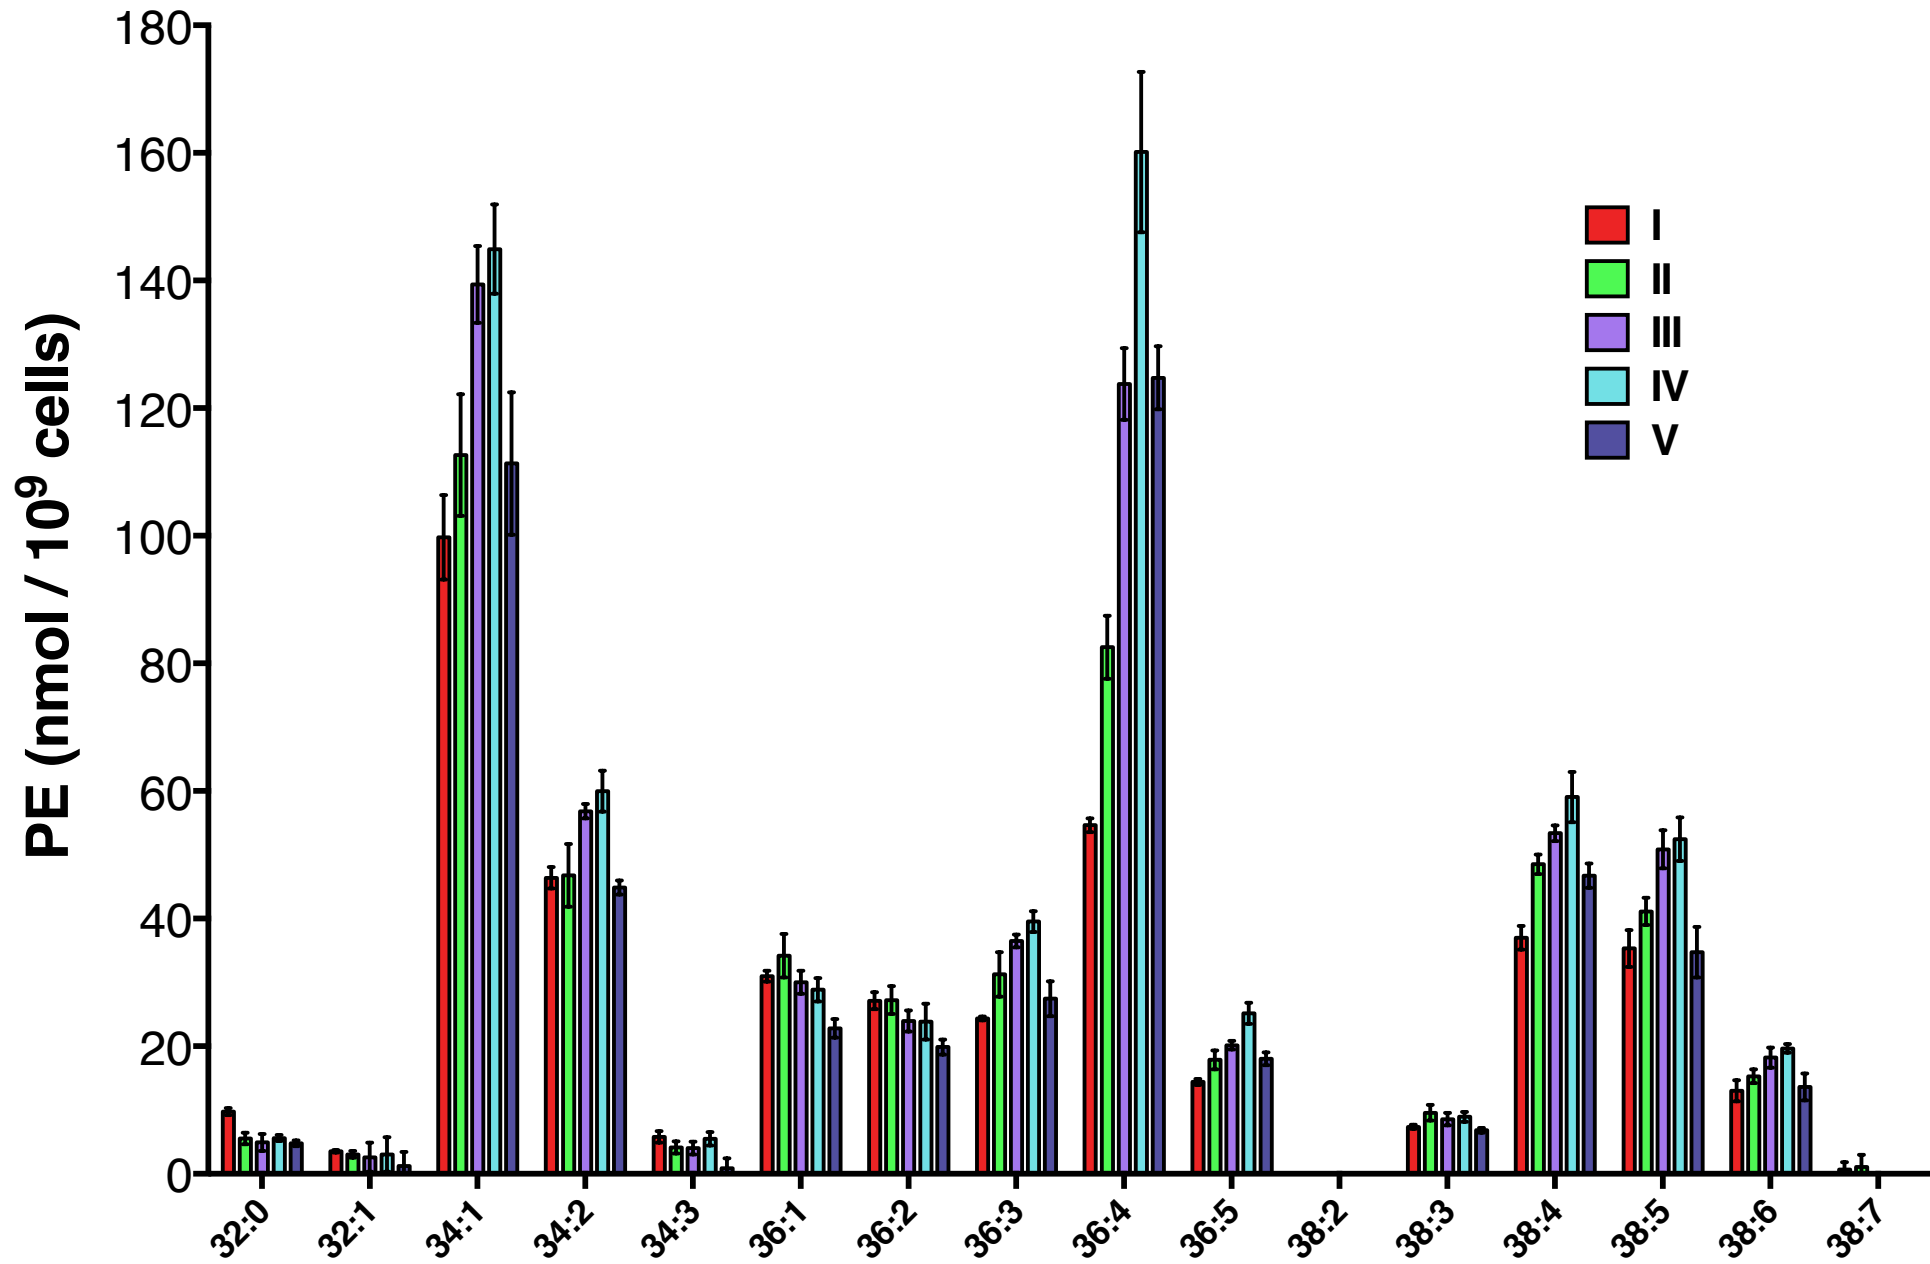

# Additional file 5D. (cont)

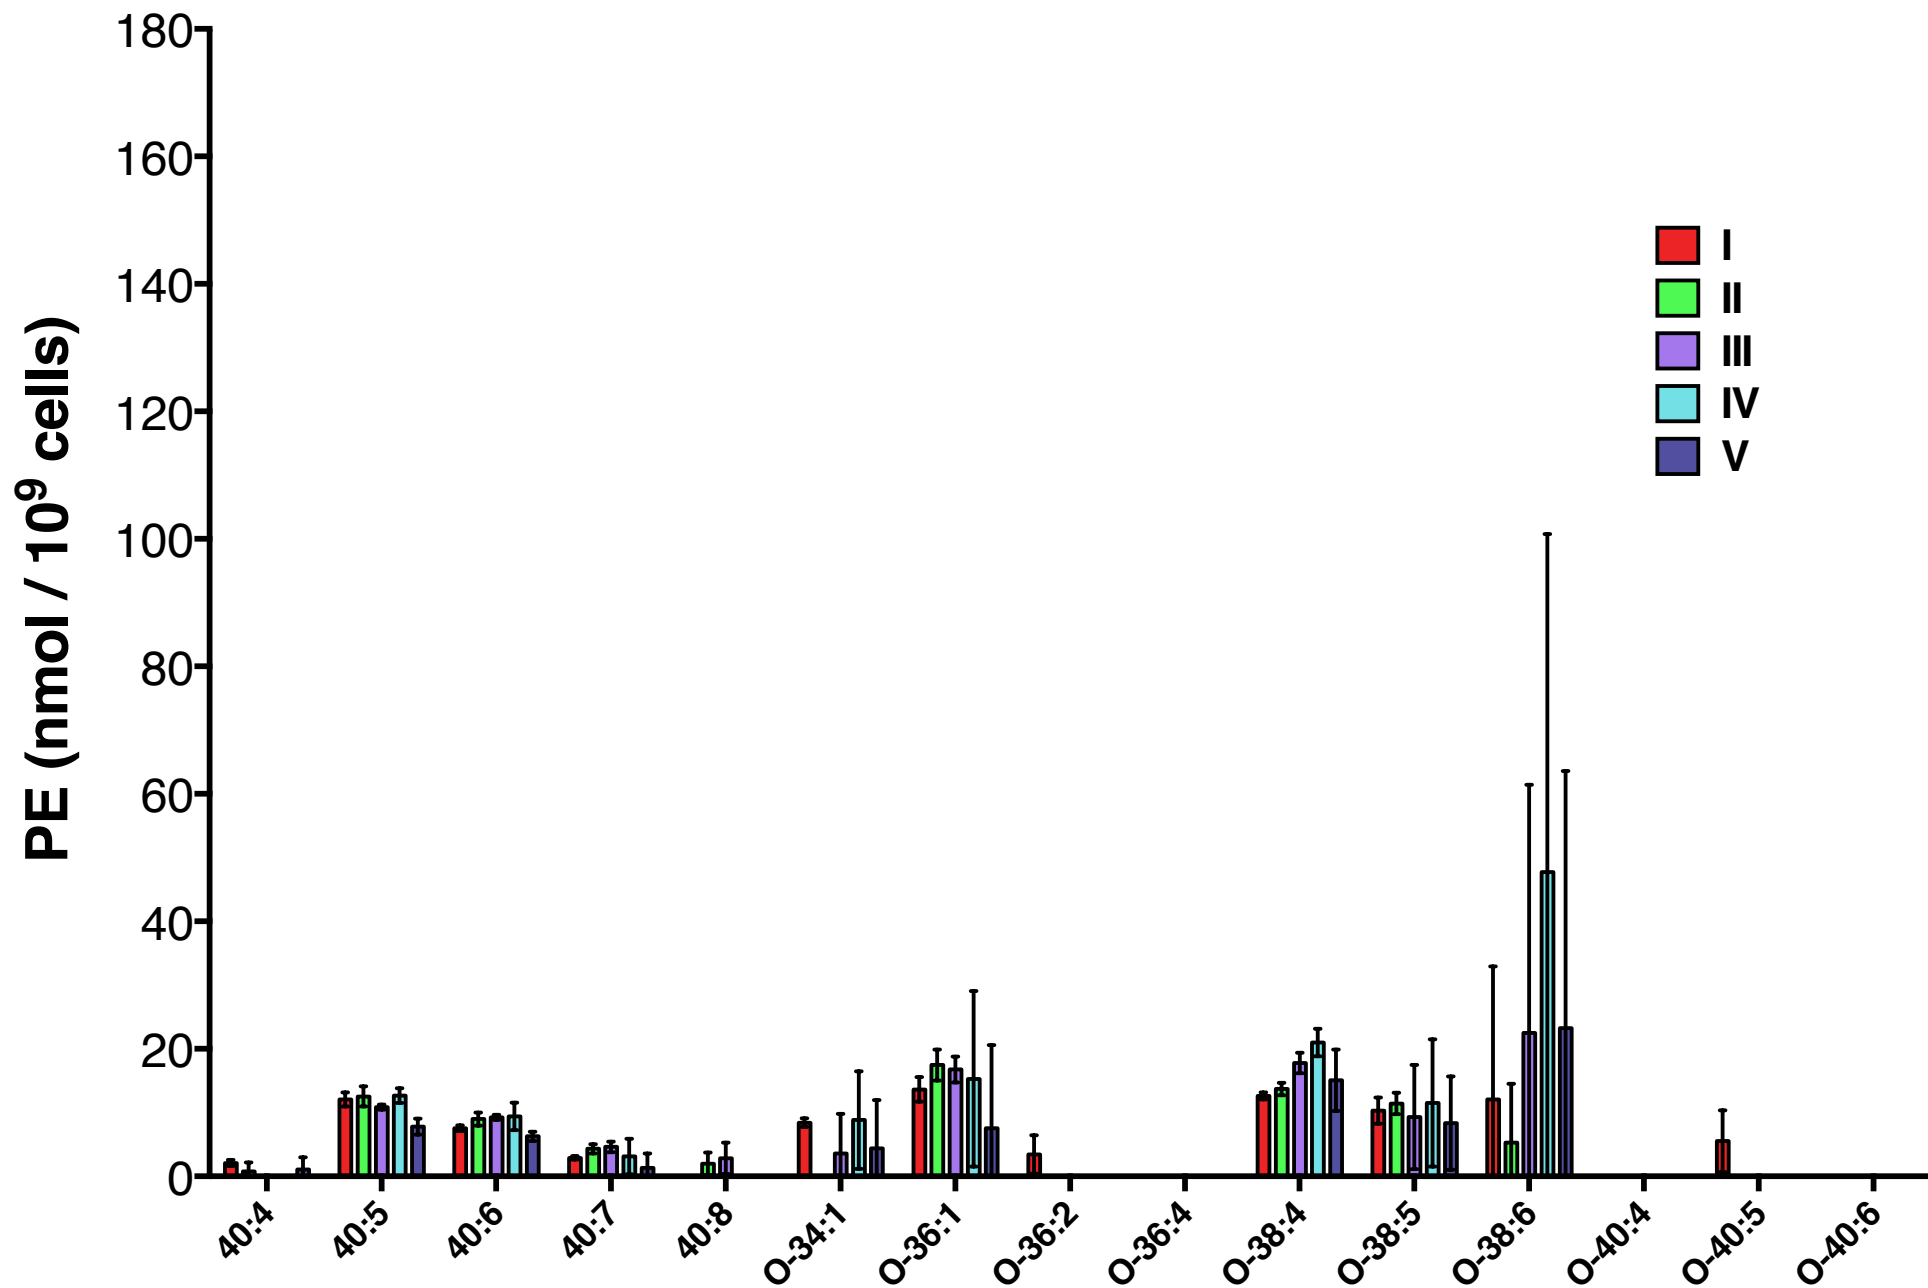

# Additional file 5E.

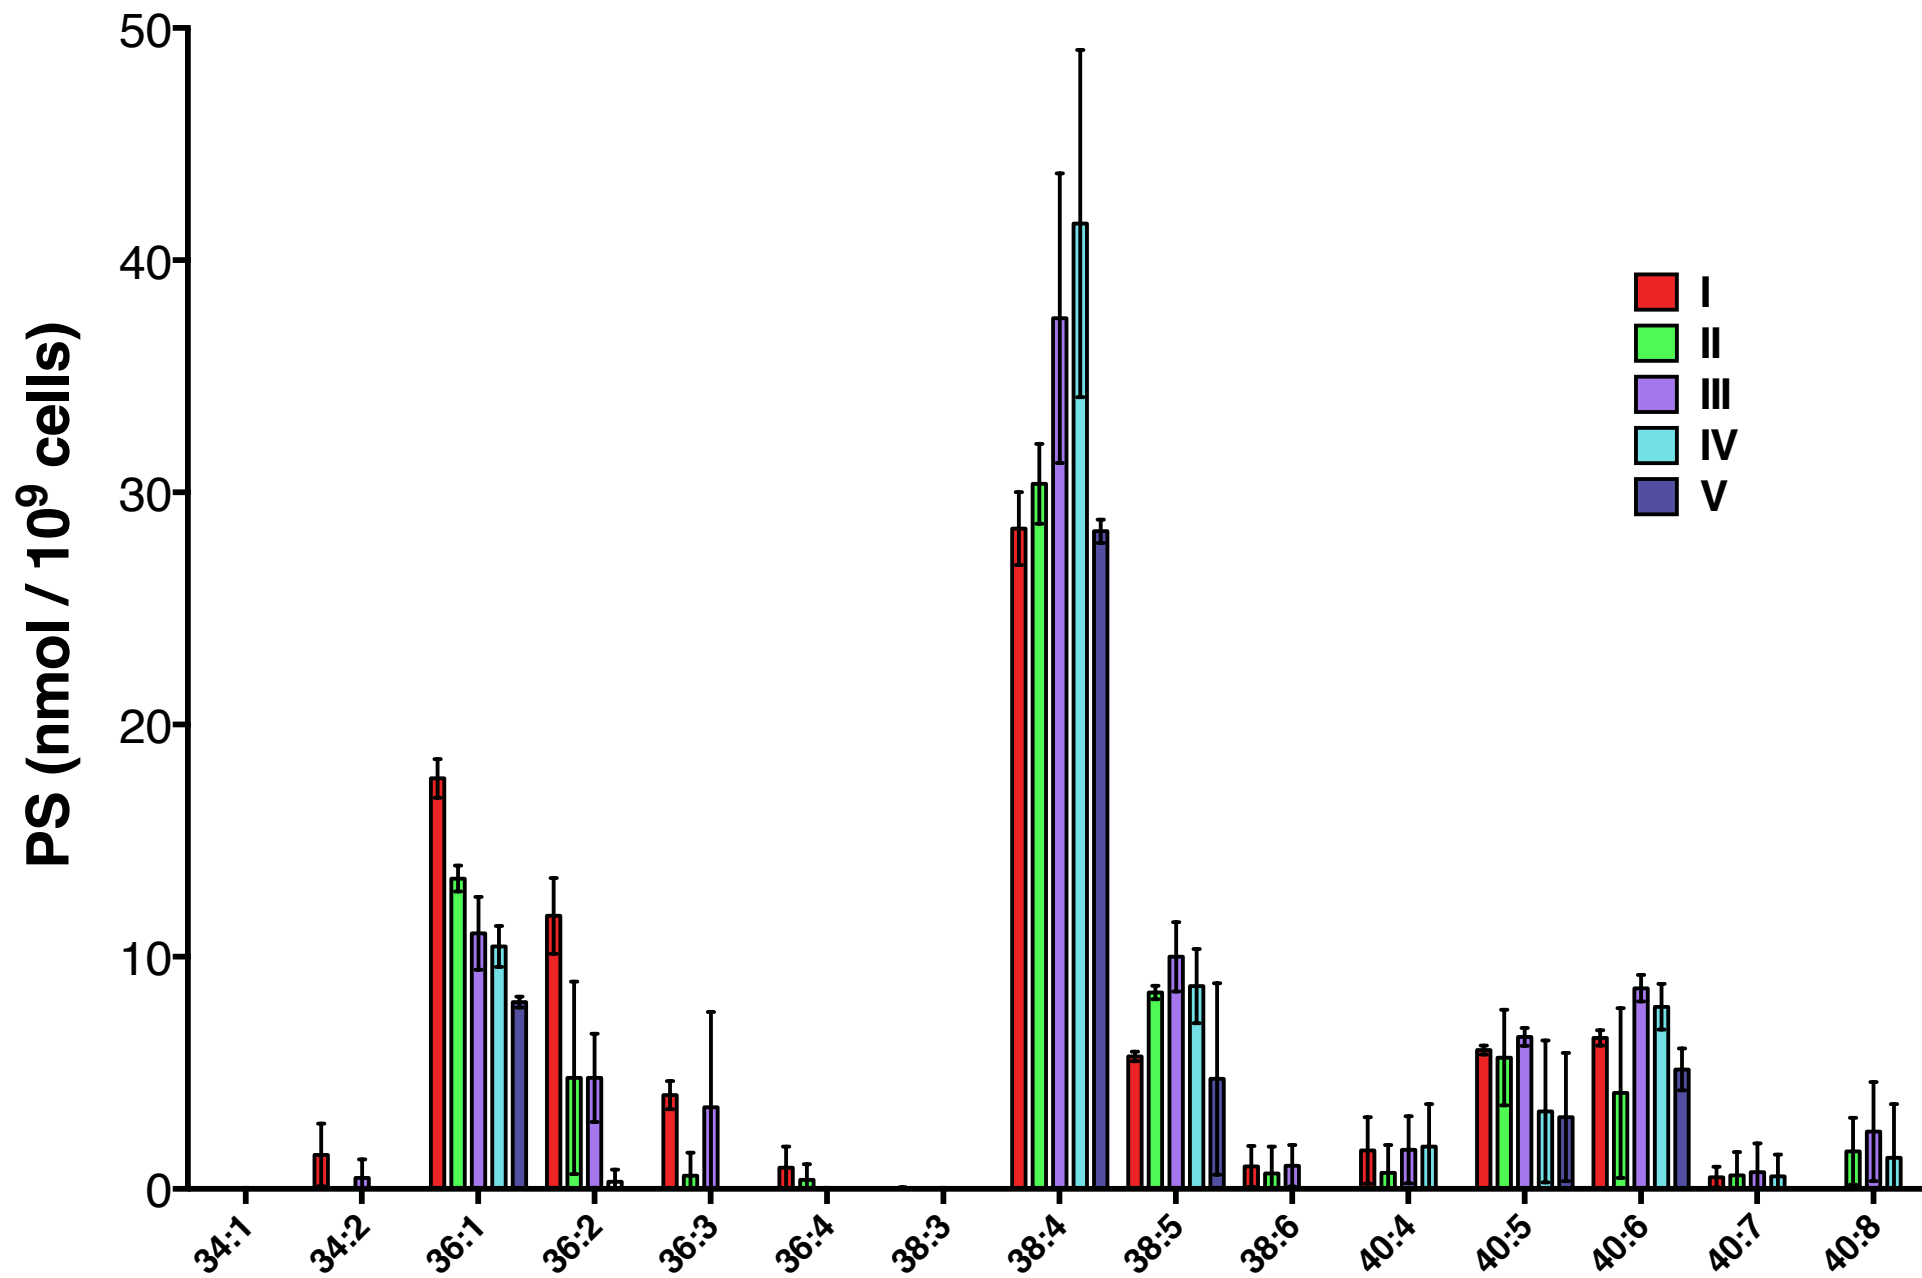

Additional file 5F.

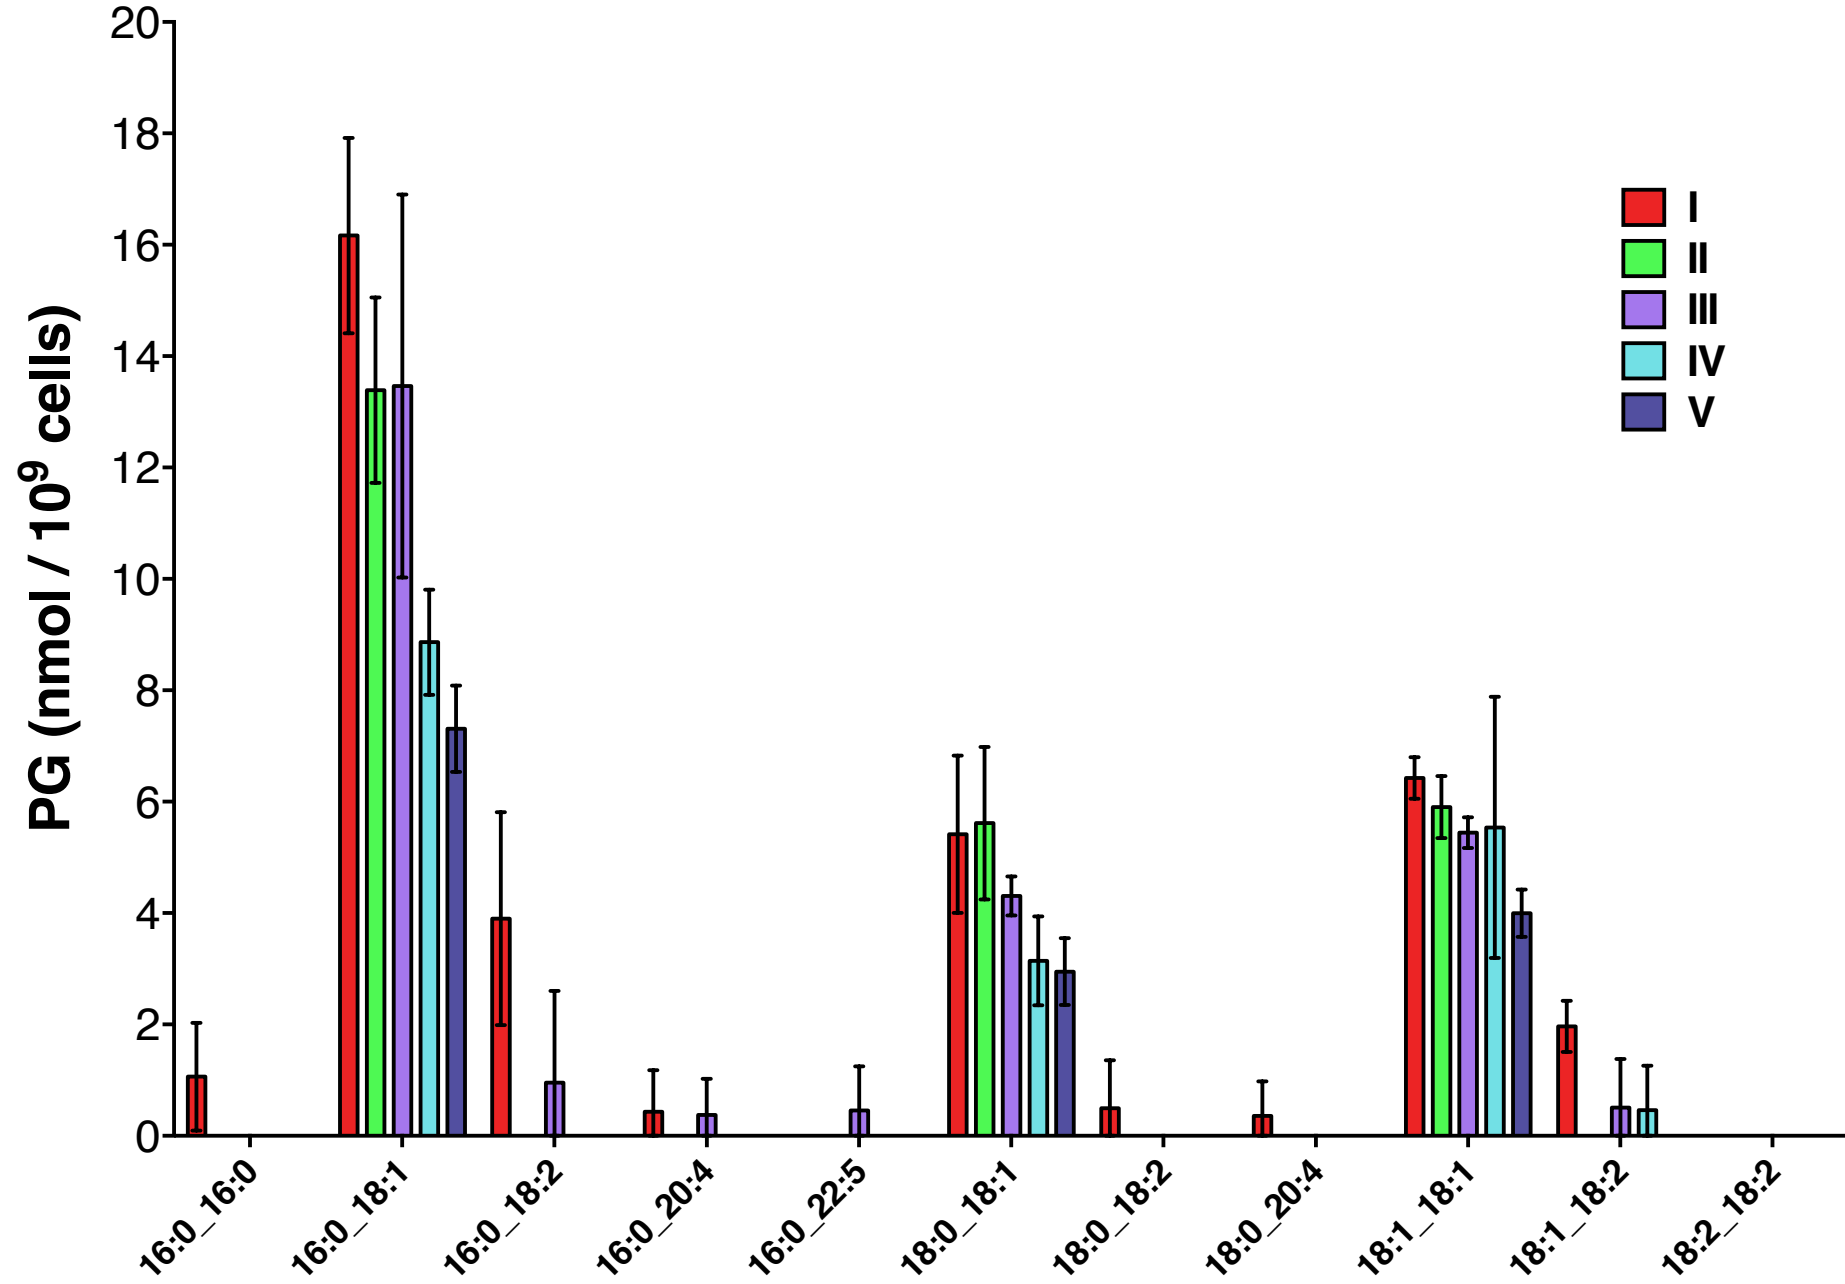



Additional file 5G.

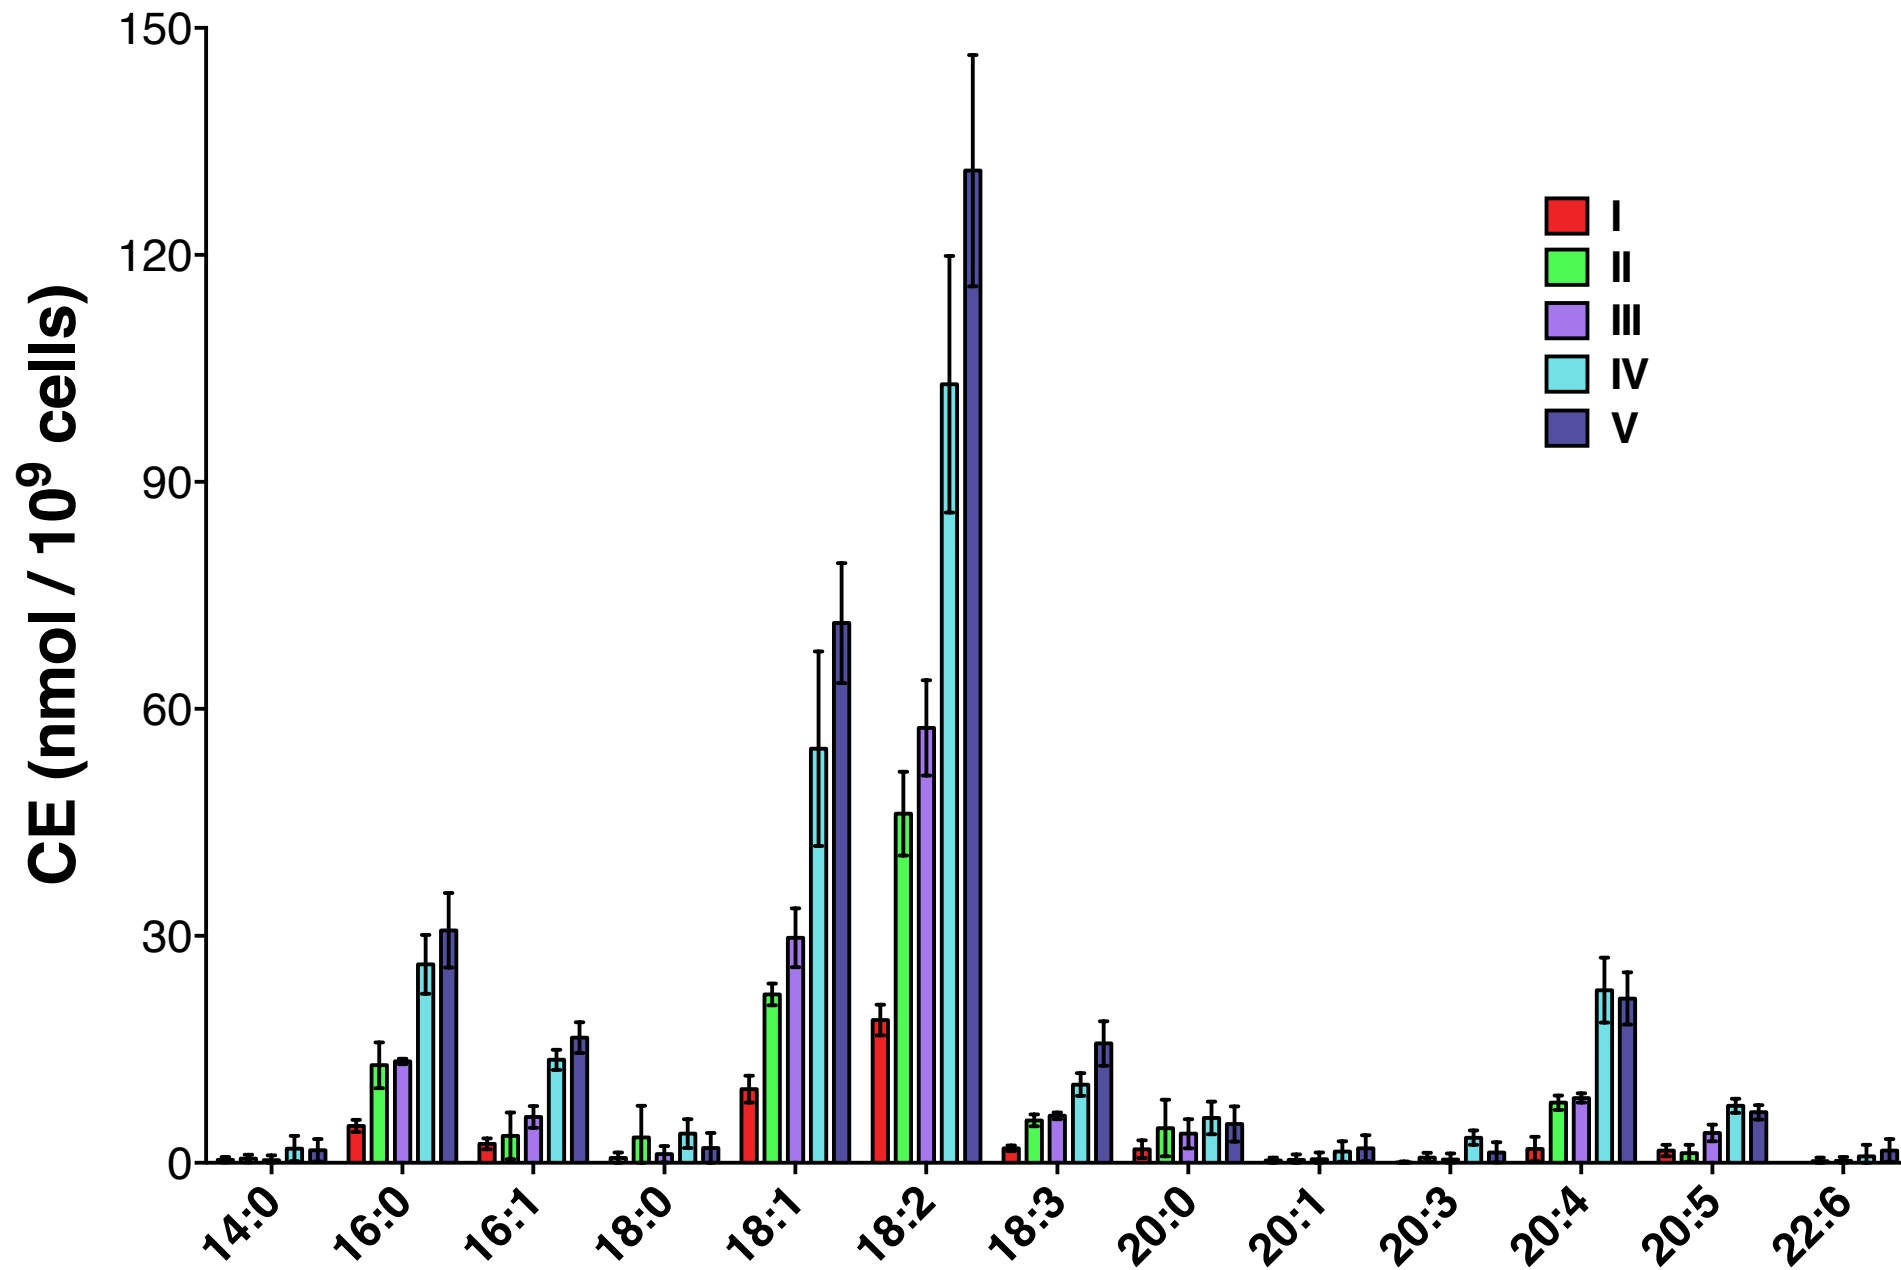

# Additional file 5H.

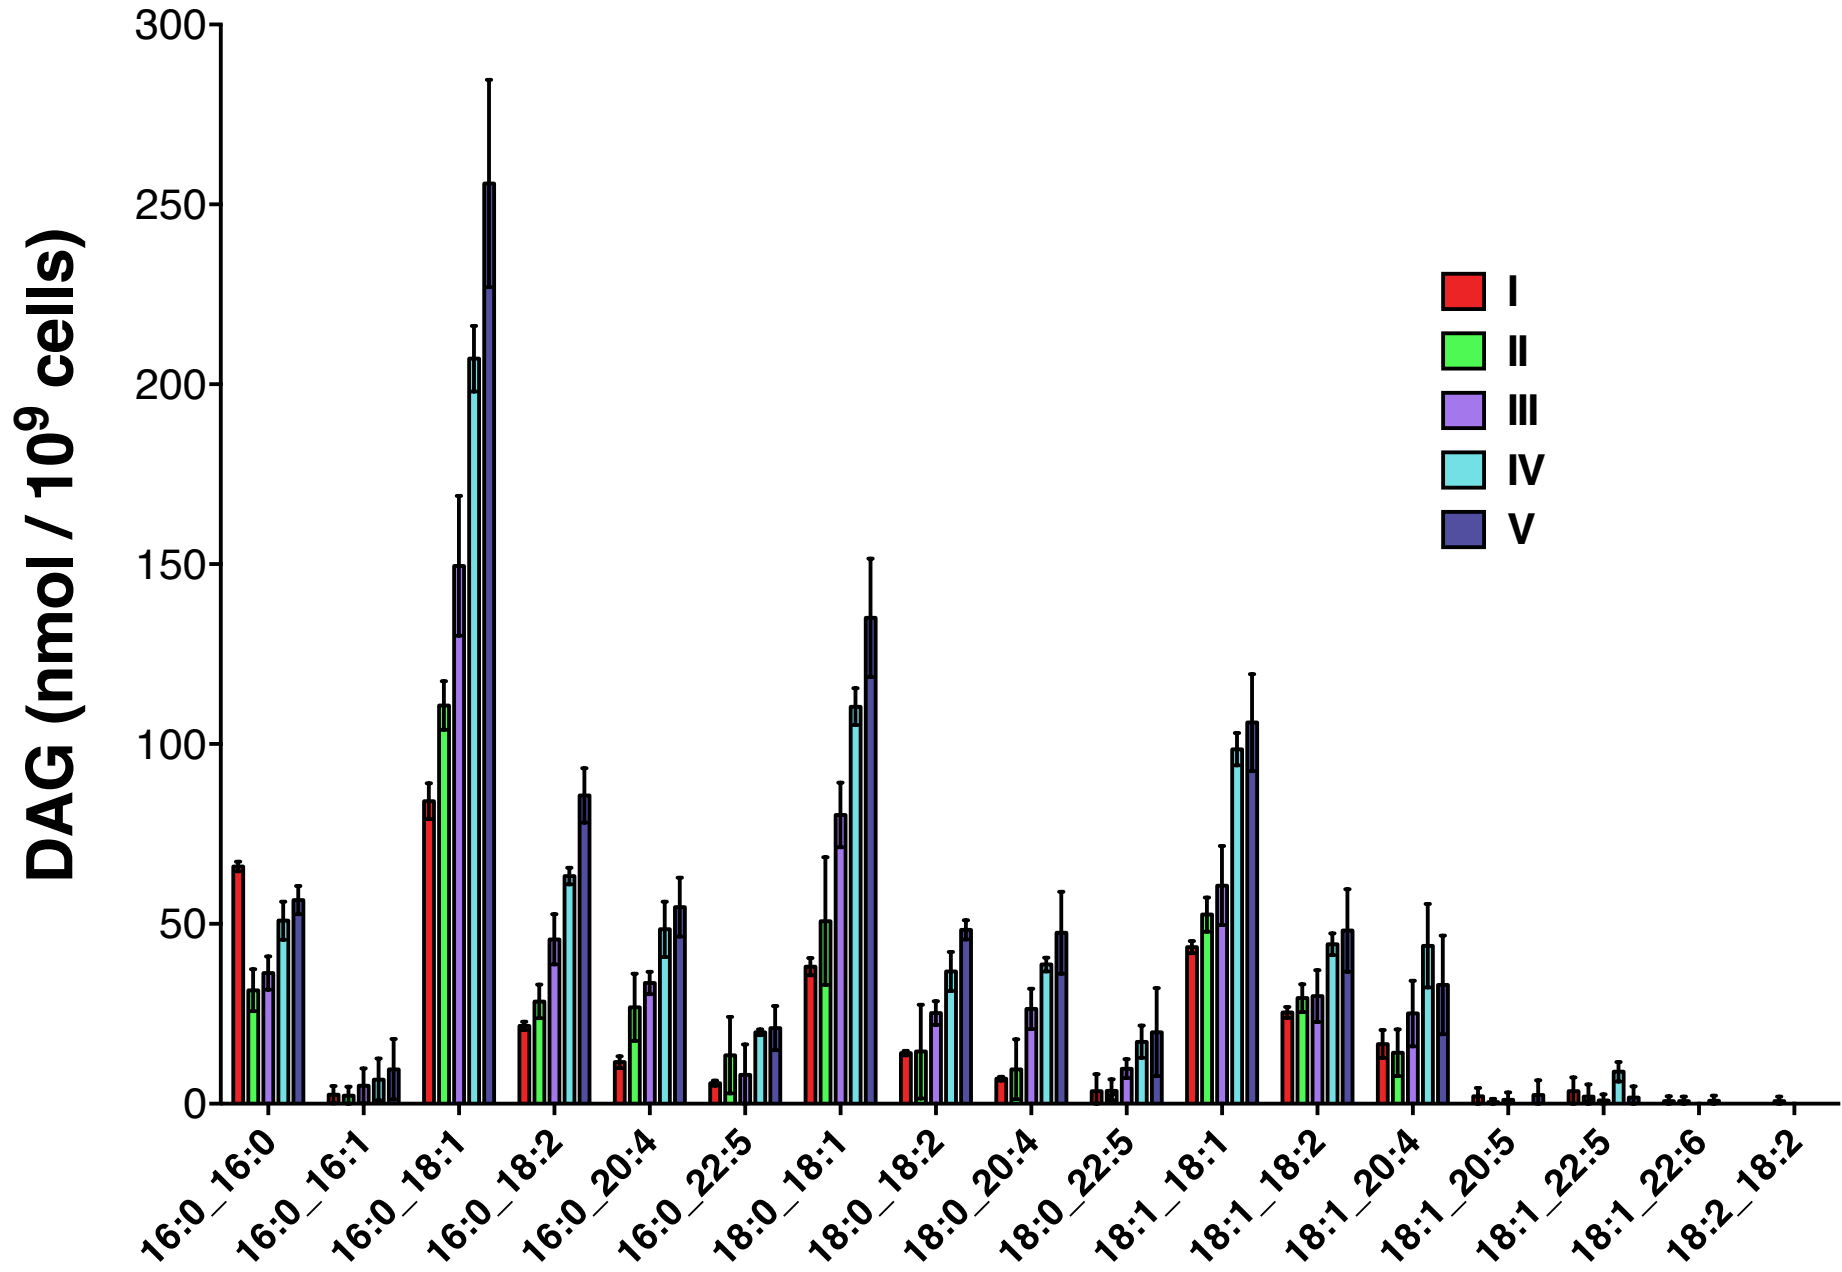

# Additional file 5I.

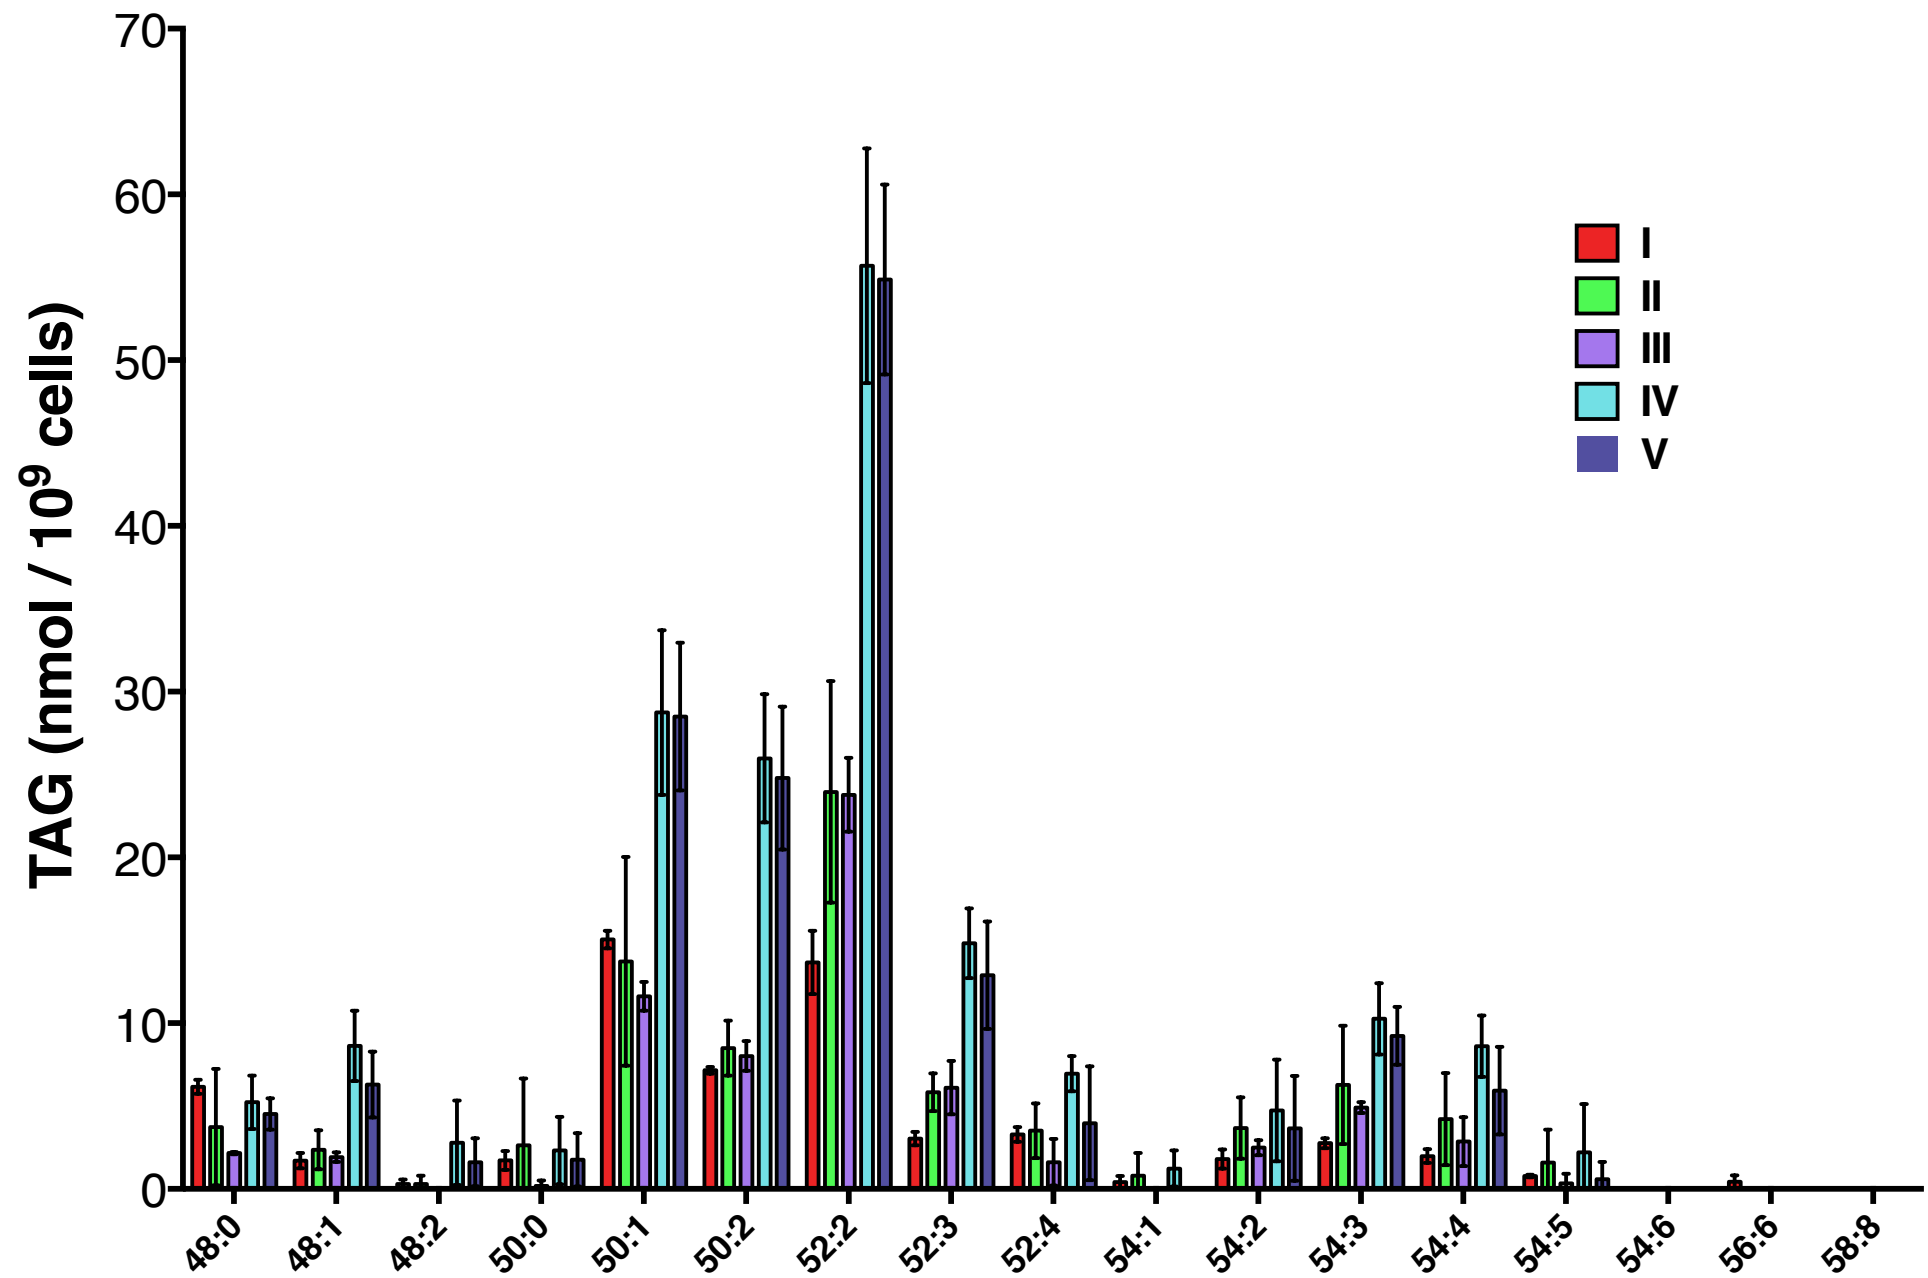

Supplement: 12936_2016_1130_MOESM5_ESM.pdf [file 12936_2016_1130_MOESM5_ESM.pdf]
