# Supplementary material for: Changes in lipid composition during sexual development of the malaria parasite Plasmodium falciparum
Source: Springer Nature journal article supplement (doi:10.1186/s12936-016-1130-z), 2016-02-06
Supplement: MOESM3 [file 9762128]

### Additional file 3.

| Target Lipid | Ion mode | MS/MS               | CID energy |
|--------------|----------|---------------------|------------|
| PC           | + ve     | PI 184.1 <i>m/z</i> | 40         |
| PG           | - ve     | PI fatty acids      | 40-55      |
| SM           | + ve     | PI 184.1 <i>m/z</i> | 40         |
| Cer          | + ve     | PI 264.4 <i>m/z</i> | 35         |
| PE           | + ve     | NL 141              | 30         |
| PS           | + ve     | NL 185              | 25         |
| CE           | + ve     | PI 369.4 <i>m/z</i> | 25         |
| Free Chol    | + ve     | PI 369.4 <i>m/z</i> | 15         |
| <b>TAG</b>   |          |                     |            |
| 14:0         | + ve     | NL 245.2            | 35         |
| 16:1         | + ve     | NL 271.3            | 35         |
| 16:0         | + ve     | NL 273.3            | 35         |
| 18:2         | + ve     | NL 297.3            | 35         |
| 18:1         | + ve     | NL 299.3            | 35         |
| 18:0         | + ve     | NL 301.3            | 35         |
| 20:4         | + ve     | NL 321.3            | 35         |
| 22:6         | + ve     | NL 345.3            | 35         |
| <b>DAG</b>   |          |                     |            |
| 16:1         | + ve     | PI 311.3 <i>m/z</i> | 32         |
| 16:0         | + ve     | PI 313.3 <i>m/z</i> | 32         |
| 17:0         | + ve     | PI 327.3 <i>m/z</i> | 32         |
| 18:2         | + ve     | PI 337.3 <i>m/z</i> | 32         |
| 18:1         | + ve     | PI 339.3 <i>m/z</i> | 32         |
| 18:0         | + ve     | PI 341.3 <i>m/z</i> | 32         |
