# Supplementary material for: Changes in lipid composition during sexual development of the malaria parasite Plasmodium falciparum
Source: Springer Nature journal article supplement (doi:10.1186/s12936-016-1130-z), 2016-02-06
Supplement: MOESM4 [file 9762128]

## Additional file 4.

| Lipid                              | uRBC            | Trophozoite       | I                 | II                | III               | IV               | V                |
|------------------------------------|-----------------|-------------------|-------------------|-------------------|-------------------|------------------|------------------|
| <b>Phospholipids</b>               |                 |                   |                   |                   |                   |                  |                  |
| phosphatidylcholine                | 181 ± 27 (23)   | 741 ± 240 (34)    | 995 ± 17 (36)     | 967 ± 46 (30)     | 1060 ± 33 (26)    | 1179 ± 80 (23)   | 1265 ± 71 (24)   |
| phosphatidylethanolamine           | 86 ± 14 (11)    | 425 ± 150 (20)    | 501 ± 25 (18)     | 557 ± 11 (17)     | 671 ± 11 (17)     | 766 ± 52 (15)    | 553 ± 45 (11)    |
| phosphatidylserine                 | 4.3 ± 6.7 (4.3) | 79.7 ± 32.6 (3.7) | 85.7 ± 2.6 (3.1)  | 71.3 ± 5.9 (2.2)  | 88.2 ± 3.9 (2.2)  | 76.0 ± 2.8 (1.5) | 49.4 ± 3.7 (1.0) |
| phosphatidylglycerol               | 0.2 ± 0.2 (0.0) | 58.5 ± 25.0 (2.7) | 36.2 ± 1.0 (1.3)  | 24.9 ± 1.6 (0.8)  | 25.5 ± 3.4 (0.6)  | 18.0 ± 2.0 (0.4) | 14.3 ± 0.8 (0.3) |
| <b>Sphingolipids</b>               |                 |                   |                   |                   |                   |                  |                  |
| sphingomyelin                      | 89 ± 15 (11)    | 52.2 ± 18.1 (2.4) | 108.4 ± 5.4 (3.9) | 151.7 ± 3.1 (4.8) | 255 ± 20 (6.3)    | 346 ± 32 (6.8)   | 362 ± 11 (7.0)   |
| ceramide                           | 4.9 ± 0.6 (0.6) | 5.5 ± 3.3 (0.3)   | 6.8 ± 0.1 (0.2)   | 7.8 ± 0.2 (0.2)   | 12.2 ± 1.2 (0.3)  | 15.1 ± 1.5 (0.3) | 18.1 ± 1.1 (0.3) |
| <b>Cholesterol</b>                 | 366 ± 62 (47)   | 410 ± 9 (19)      | 579 ± 51 (21)     | 823 ± 68 (26)     | 1195 ± 81 (30)    | 1473 ± 16 (29)   | 1518 ± 16 (29)   |
| <b>Neutral lipids</b>              |                 |                   |                   |                   |                   |                  |                  |
| cholesteryl esters                 | 2.9 ± 1.1 (0.3) | n.d.              | 44.8 ± 3.3 (1.6)  | 109.6 ± 2.1 (3.4) | 132.1 ± 6.8 (3.3) | 256 ± 17 (5.0)   | 308 ± 15 (5.9)   |
| diacylglycerols                    | 16 ± 2 (2.0)    | 319.4 ± 100 (15)  | 346.3 ± 3.8 (13)  | 392 ± 19 (12)     | 538 ± 44 (13)     | 796.2 ± 5.2 (16) | 926 ± 46 (18)    |
| triacylglycerols                   | 4.7 ± 0.4 (0.6) | 59 ± 22 (2.7)     | 60.3 ± 3.2 (2.2)  | 81 ± 21 (2.5)     | 66.0 ± 4.8 (1.6)  | 178 ± 20 (3.5)   | 159 ± 14 (3.1)   |
| <b>Total lipids</b>                | 784 ± 125       | 2151 ± 576        | 2763 ± 38         | 3186 ± 26         | 4043 ± 145        | 5103 ± 43        | 5172 ± 59        |
| <b>Cholesterol / Phospholipids</b> | 1.22            | 0.31              | 0.34              | 0.47              | 0.57              | 0.62             | 0.68             |
