# Supplementary material for: Changes in lipid composition during sexual development of the malaria parasite Plasmodium falciparum
Source: Springer Nature journal article supplement (doi:10.1186/s12936-016-1130-z), 2016-02-06

# Additional file 6

**A.**

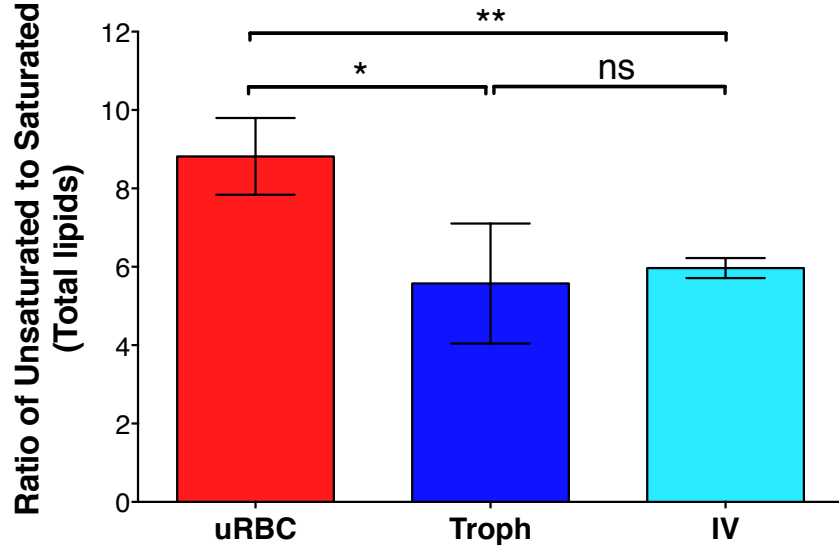

**B.**

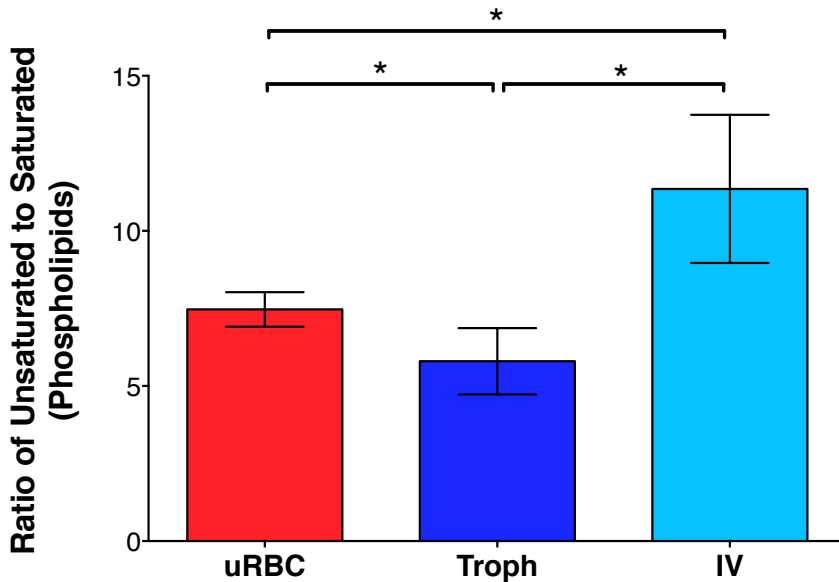

**C.**

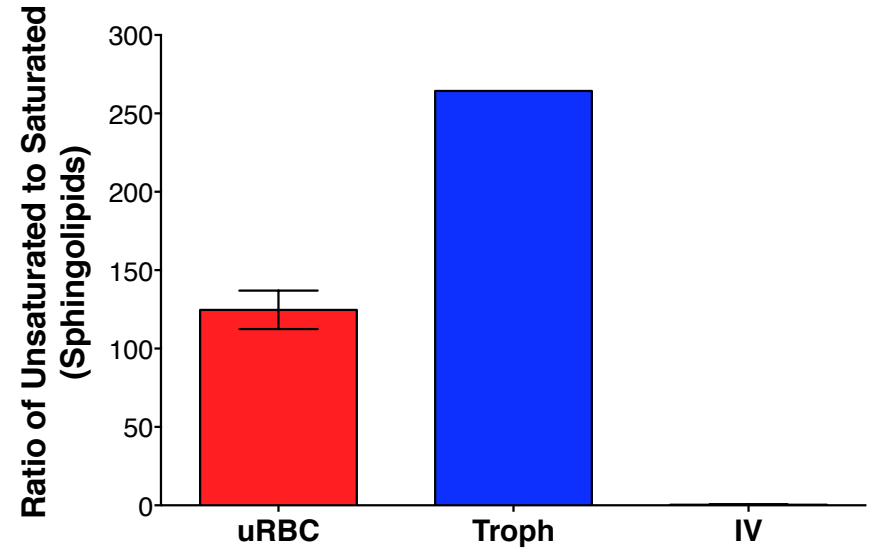

**D.**

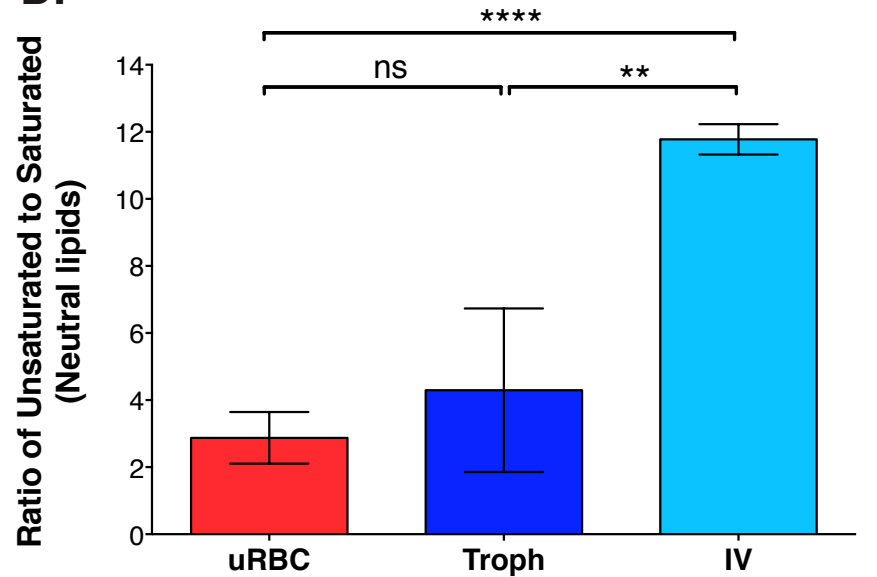

Supplement: MOESM6 [file 9762128]
